# Supplementary material for: Chromatin tracing and multiplexed imaging of nucleome architectures (MINA) and RNAs in single mammalian cells and tissue
Source: Springer Nature journal article supplement (doi:10.1038/s41596-021-00518-0), 2021-04-26
Supplement: MOESM3 [file 41596_2021_518_MOESM3_ESM22.xlsx]

## Sheet: MINA TAD tracing
TAD tracing secondary probe 1	/5Alex647N/CGCAACGCTTGGGACGGTTCCAATCGGATC
TAD tracing secondary probe 2	/5Alex647N/CGAATGCTCTGGCCTCGAACGAACGATAGC
TAD tracing secondary probe 3	/5Alex647N/ACAAATCCGACCAGATCGGACGATCATGGG
TAD tracing secondary probe 4	/5Alex647N/CAAGTATGCAGCGCGATTGACCGTCTCGTT
TAD tracing secondary probe 5	/5Alex647N/AAGTCGTACGCCGATGCGCAGCAATTCACT
TAD tracing secondary probe 6	/5Alex647N/CGAAACATCGGCCACGGTCCCGTTGAACTT
TAD tracing secondary probe 7	/5Alex647N/ACGAATCCACCGTCCAGCGCGTCAAACAGA
TAD tracing secondary probe 8	/5Alex647N/CGCGAAATCCCCGTAACGAGCGTCCCTTGC
TAD tracing secondary probe 9	/5Alex647N/GCATGAGTTGCCTGGCGTTGCGACGACTAA
TAD tracing secondary probe 10	/5Alex647N/CCGTCGTCTCCGGTCCACCGTTGCGCTTAC
TAD tracing secondary probe 11	/5Alex647N/GGCCAATGGCCCAGGTCCGTCACGCAATTT
TAD tracing secondary probe 12	/5Alex647N/TTGATCGAATCGGAGCGTAGCGGAATCTGC
TAD tracing secondary probe 13	/5Alex647N/CGCGCGGATCCGCTTGTCGGGAACGGATAC
TAD tracing secondary probe 14	/5Alex647N/GCCTCGATTACGACGGATGTAATTCGGCCG
TAD tracing secondary probe 15	/5Alex647N/GCCCGTATTCCCGCTTGCGAGTAGGGCAAT
TAD tracing secondary probe 16	/5Alex647N/GCGGGAAGCACGTGGATTAGGGCATCGACC
TAD tracing secondary probe 17	/5Alex647N/ATTTGCGTGCCGTGCTAGCCGTTGTTATGG
TAD tracing secondary probe 18	/5Alex647N/AGGGTCATCGCCGTAAGGTGGGACCGAGGG
TAD tracing secondary probe 19	/5Alex647N/TTGTGTATCCCGCCGGATCTTTGAATCAAC
TAD tracing secondary probe 20	/5Alex647N/TGCTAGTTCGATCGCGCAATTGCGTAGTTC
TAD tracing secondary probe 21	/5Alex647N/CGGATTGGTCGTCCCGGAAGCACGGGCGAC
TAD tracing secondary probe 22	/5Alex647N/GCACCGGTCGGGATTCCGTAGGCACGCCGA
TAD tracing secondary probe 23	/5Alex647N/ACACCCGATACGTCGTGGGACGTGGACCGT
TAD tracing secondary probe 24	/5Alex647N/CGACGATGATCGCAATCGGAGAACTACACC
TAD tracing secondary probe 25	/5Alex647N/CTTTACGCGGATCGCCTCAATAAAGGCGAC
TAD tracing secondary probe 26	/5Alex647N/TGACATCGATAAGCGGGCGCACCCGCGCGC
TAD tracing secondary probe 27	/5Alex647N/GATCGACCGGCGTAGCTCACCCGGTTAGCG
TAD tracing secondary probe 28	/5Alex647N/GGCGGGACACCGTATGAGGACGCGTCAATG
TAD tracing secondary probe 29	/5Alex647N/GGGCGACGGGACTCTATCGGCATGGAGGTA
TAD tracing secondary probe 30	/5Alex647N/AGTCTGGGTCGTCCGTAGGCAAAGGGTCCG
TAD tracing secondary probe 31	/5Alex647N/TGATTTCGCGTGGAGGCGTCGGTTAGCAAC
TAD tracing secondary probe 32	/5Alex647N/AAGATTATTGTCGCGCCGGGGACTATCGGC
TAD tracing secondary probe 33	/5Alex647N/AGGAAACGGCGCGAACTGAGAGTATGGTTA
TAD tracing secondary probe 34	/5Alex647N/AGAATGGTTGCGCACGATCATTTCGTCGTA
TAD tracing secondary probe 35	/5Alex647N/TCGGCAATGTAGCGTCTCGTGGTCAATAAT
TAD tracing secondary probe 36	/5Alex647N/AAGCGGTCCCGTCCGAGGTATAATGTCGGC
TAD tracing secondary probe 37	/5Alex647N/GTGCGATGCTAAACGCTGCATGTGAATGCG
TAD tracing secondary probe 38	/5Alex647N/GATCGTTCACCGCGCGTTGAGCGTGAACTA
TAD tracing secondary probe 39	/5Alex647N/GTAGAGACGACGCGCATCCGGAGATACGCG
TAD tracing secondary probe 40	/5Alex647N/CTTAGTACGCGGCGGTCGTGAATCGCGATG
TAD tracing secondary probe 41	/5ATTO565N/TTCGGATACCGCCACCGTCCTAAGCGAATA
TAD tracing secondary probe 42	/5ATTO565N/AGCAAATCGTGTCTCGCCTTGAGCGTACTGA
TAD tracing secondary probe 43	/5ATTO565N/ATAAGACTCGCCCGATGCCCTATTCGCGGT
TAD tracing secondary probe 44	/5ATTO565N/AGTGGTCGCTTCGACCCTTCATGATACCGGA
TAD tracing secondary probe 45	/5ATTO565N/AGGGTTCAACGTCCGACGGTTCAGTGCCGGT
TAD tracing secondary probe 46	/5ATTO565N/TGGACTTAACCGCGAAGGGCCAACGACGAC
TAD tracing secondary probe 47	/5ATTO565N/CTCAGTTTGGCGCGTCGACTGTCACATATG
TAD tracing secondary probe 48	/5ATTO565N/CGGTACATTGCCGCGTTAGCCATTCTAGCT
TAD tracing secondary probe 49	/5ATTO565N/AGAGCTGTCTTGCGGCGCTATGTAGTACGAG
TAD tracing secondary probe 50	/5ATTO565N/AAGCCGAGGTATGCCGAATGGATTGCCGTC

## Sheet: MINA 5kb-res tracing
5kb-resolution tracing secondary probe 1	/5ATTO565N/AGGACACGGGATCGACGGTAGTGGATCGATT
5kb-resolution tracing secondary probe 2	/5ATTO565N/CGACCTTAGGTTCCGCGTCATGTACCGGTT
5kb-resolution tracing secondary probe 3	/5ATTO565N/TGTTTACGACGTGGGCTGCTGCGATTTCAC
5kb-resolution tracing secondary probe 4	/5ATTO565N/AGGGAAACGGTTGTCGCTACCGGCTTTGCTA
5kb-resolution tracing secondary probe 5	/5ATTO565N/AGATGGTCGACTGGCGGTCTTAATATGCCCA
5kb-resolution tracing secondary probe 6	/5ATTO565N/ATCCATATGACCGGCGGCCTTTTCTCGGAC
5kb-resolution tracing secondary probe 7	/5ATTO565N/ATGATCCACGACCGAGCAGGTTAGTTGACG
5kb-resolution tracing secondary probe 8	/5ATTO565N/TAGACGCACCACGCTCGACAAGAACAGGAC
5kb-resolution tracing secondary probe 9	/5ATTO565N/ACTCGTTTAACGGCCGGTTGGTCTACGGAT
5kb-resolution tracing secondary probe 10	/5ATTO565N/AGGGTACTCGCGTCTGGAACGACGGATTCAG
5kb-resolution tracing secondary probe 11	/5ATTO565N/AACATCGGATCGGTGCGGTGGGATGGATAA
5kb-resolution tracing secondary probe 12	/5ATTO565N/AGACGACGCACGTTCGTACCGCGTACTTCG
5kb-resolution tracing secondary probe 13	/5ATTO565N/TTTGCTCGCAAGTGCGCACGAGTTGAACTG
5kb-resolution tracing secondary probe 14	/5ATTO565N/CCAATGTACCTCGCCGCGTTTAGACGGGCT
5kb-resolution tracing secondary probe 15	/5ATTO565N/AGTTTCCATACGCGGCGTGAATATCGCGGC
5kb-resolution tracing secondary probe 16	/5ATTO565N/AGCTACAGCGTTACGGGCCCAGACGTTTCAT
5kb-resolution tracing secondary probe 17	/5ATTO565N/TTTATCGTGCGTGTCCGCCAGTACCGTGAG
5kb-resolution tracing secondary probe 18	/5ATTO565N/TTAGGTCCGGCGATTAGCGCTCGTGCGCGA
5kb-resolution tracing secondary probe 19	/5ATTO565N/CGTGCGGGAACCGTATCCCTGGCGCGGACT

## Sheet: MINA RNA MERFISH
RNA MERFISH secondary probe 1	/5Alex750N/ATCCTCCTTCAATACATCCC
RNA MERFISH secondary probe 2	/5Alex750N/ACCCTCTAACTTCCATCACA
RNA MERFISH secondary probe 3	/5Alex750N/ACCACAACCCATTCCTTTCA
RNA MERFISH secondary probe 4	/5Alex750N/ACCCTTTACAAACACACCCT
RNA MERFISH secondary probe 5	/5Alex750N/ACATTACACCTCATTCTCCC
RNA MERFISH secondary probe 6	/5Alex750N/TTTACTCCCTACACCTCCAA
RNA MERFISH secondary probe 7	/5Alex750N/ACCCTTACTACTACATCATC
RNA MERFISH secondary probe 8	/5Alex750N/TATTCACCTTACAAACCCTC
RNA MERFISH secondary probe 9	/5Alex750N/ACACTACCACCATTTCCTAT
RNA MERFISH secondary probe 10	/5Alex750N/ACTCCACTACTACTCACTCT
RNA MERFISH secondary probe 11	/5Alex750N/TTTCTACCACTAATCAACCC
RNA MERFISH secondary probe 12	/5Alex750N/TCCTATTCTCAACCTAACCT
RNA MERFISH secondary probe 13	/5Alex750N/TATCCTTCAATCCCTCCACA
RNA MERFISH secondary probe 14	/5Alex750N/TTCTCCCTCTATCAACTCTA
RNA MERFISH secondary probe 15	/5Alex750N/TCCTAACAACCAACTACTCC
RNA MERFISH secondary probe 16	/5Alex750N/TCTATCATTACCCTCCTCCT
